# Supplementary material
Source: publisher figshare collection journal article supplement (https://acs.figshare.com/ndownloader/files/5088835)
Supplement: Supplementary file 1 [file 5088835]

   data_global
_audit_creation_date              'Mar 10 2005'
_audit_creation_method            SHELXL-97 
_audit_update_record                   ?
#------------------------------------------------------------------------------
# PROCESSING SUMMARY (IUCr Office Use Only) 
_journal_date_recd_electronic          ?
_journal_date_from_coeditor            ?
_journal_date_accepted                 ?
_journal_coeditor_code                 ?
#------------------------------------------------------------------------------
# SUBMISSION DETAILS 
_publ_contact_author_name             'Norihiro Tokitoh'
_publ_contact_author_address
;
    Institute for Chemical Research, Kyoto University, Gokasho, Uji, 
    Kyoto 611-0011, Japan. 
;
_publ_contact_author_email            ' tokitoh@boc.kuicr.kyoto-u.ac.jp'
_publ_contact_author_fax              ' +81-774-38-3209 '
_publ_contact_author_phone            ' +81-774-38-3200 '
_publ_contact_letter
;
    
;
_publ_requested_journal               ' Organometallics'
_publ_requested_category              ' CHOOSE FI FM FO CI CM CO or AD'
_publ_requested_coeditor_name          ?
#------------------------------------------------------------------------------
# TITLE AND AUTHOR LIST 

_publ_section_title
;
    Synthesis and Properties of h6-Silabenzene-M(CO)3 Complexes (M= Cr and Mo) 
;
_publ_section_title_footnote
;
    
;
loop_
_publ_author_name
_publ_author_footnote
_publ_author_address
' Akihiro Shinohara '
;
  
;
;
    Institute for Chemical Research, Kyoto University, 
    Gokasho, Uji, Kyoto 611-0011, Japan. 

' Nobuhiro Takeda '
;
  
;
;
    Institute for Chemical Research, Kyoto University, 
    Gokasho, Uji, Kyoto 611-0011, Japan. 

' Takahiro Sasamori '
;
  
;
;
    Institute for Chemical Research, Kyoto University, 
    Gokasho, Uji, Kyoto 611-0011, Japan. 

' Norihiro Tokitoh '
;
  
;
;
    Institute for Chemical Research, Kyoto University, 
    Gokasho, Uji, Kyoto 611-0011, Japan.

#------------------------------------------------------------------------------
# TEXT 

_publ_section_abstract
;
    
;

_publ_section_comment
;
    
;

_publ_section_acknowledgements
;
    
;

_publ_section_references
;
Sheldrick, G.M. (1997). SHELXL97. Program for the refinement of 
crystal structures. Univ. of Goettingen, Germany.
;

_publ_section_figure_captions
;
    
;

_publ_section_exptl_prep
;
    
;

_publ_section_exptl_refinement
;
    
;   
data_cr 
 
_audit_creation_method            SHELXL-97 
_chemical_name_systematic 
; 
 ? 
; 
_chemical_name_common             'silabenzene_Crcomplex' 
_chemical_melting_point           240
_chemical_formula_moiety          '	C35 H64 Cr O3 Si7, 0.5(C6 H6)'
_chemical_formula_sum 
 'C38 H67 Cr O3 Si7' 
_chemical_formula_weight          820.55 
 
loop_ 
 _atom_type_symbol 
 _atom_type_description 
 _atom_type_scat_dispersion_real 
 _atom_type_scat_dispersion_imag 
 _atom_type_scat_source 
 'C'  'C'   0.0033   0.0016 
 'International Tables Vol C Tables 4.2.6.8 and 6.1.1.4' 
 'H'  'H'   0.0000   0.0000 
 'International Tables Vol C Tables 4.2.6.8 and 6.1.1.4' 
 'O'  'O'   0.0106   0.0060 
 'International Tables Vol C Tables 4.2.6.8 and 6.1.1.4' 
 'Si'  'Si'   0.0817   0.0704 
 'International Tables Vol C Tables 4.2.6.8 and 6.1.1.4' 
 'Cr'  'Cr'   0.3209   0.6236 
 'International Tables Vol C Tables 4.2.6.8 and 6.1.1.4' 
 
_symmetry_cell_setting            'Monoclinic' 
_symmetry_space_group_name_H-M    'p 21/n'
_symmetry_space_group_name_Hall      '-P 2yn'
_symmetry_Int_Tables_number            14

loop_ 
 _symmetry_equiv_pos_as_xyz 
 'x, y, z' 
 '-x+1/2, y+1/2, -z+1/2' 
 '-x, -y, -z' 
 'x-1/2, -y-1/2, z-1/2' 
 
_cell_length_a                    12.635(5) 
_cell_length_b                    32.737(13) 
_cell_length_c                    12.691(5) 
_cell_angle_alpha                 90.00 
_cell_angle_beta                  116.605(4) 
_cell_angle_gamma                 90.00 
_cell_volume                      4693(3) 
_cell_formula_units_Z             4 
_cell_measurement_temperature     103(2) 
_cell_measurement_reflns_used     8249 
_cell_measurement_theta_min       1.89 
_cell_measurement_theta_max       25.00
 
_exptl_crystal_description        prisum 
_exptl_crystal_colour             yellow
_exptl_crystal_size_max           0.20 
_exptl_crystal_size_mid           0.20 
_exptl_crystal_size_min           0.20 
_exptl_crystal_density_meas       ? 
_exptl_crystal_density_diffrn     1.161 
_exptl_crystal_density_method     'not measured' 
_exptl_crystal_F_000              1764 
_exptl_absorpt_coefficient_mu     0.454 
_exptl_absorpt_correction_type    multi-scan
_exptl_absorpt_correction_T_min   0.9147 
_exptl_absorpt_correction_T_max   0.9147 
_exptl_absorpt_process_details    
'Jacobson, R. (1998) Private communication' 

_exptl_special_details 
; 
 ? 
; 
 
_diffrn_ambient_temperature       103(2) 
_diffrn_radiation_wavelength      0.71070 
_diffrn_radiation_type            MoK\a 
_diffrn_radiation_source          'fine-focus sealed tube' 
_diffrn_radiation_monochromator   graphite 
_diffrn_measurement_device_type   'RIGAKU/MSC Meacury CCD' 
_diffrn_measurement_method        \w  
_diffrn_detector_area_resol_mean  7.31 
_diffrn_reflns_number             40503 
_diffrn_reflns_av_R_equivalents   0.0513 
_diffrn_reflns_av_sigmaI/netI     0.0426 
_diffrn_reflns_limit_h_min        -15 
_diffrn_reflns_limit_h_max        15 
_diffrn_reflns_limit_k_min        -38 
_diffrn_reflns_limit_k_max        38 
_diffrn_reflns_limit_l_min        -15 
_diffrn_reflns_limit_l_max        15 
_diffrn_reflns_theta_min          1.89 
_diffrn_reflns_theta_max          25.00 
_reflns_number_total              8248 
_reflns_number_gt                 7046 
_reflns_threshold_expression      >2sigma(I) 
 
_computing_data_collection        'CrystalClear' 
_computing_cell_refinement        'CrystalClear' 
_computing_data_reduction         'CrystalClear' 
_computing_structure_solution     'SHELXS-97 (Sheldrick, 1990)' 
_computing_structure_refinement   'SHELXL-97 (Sheldrick, 1997)' 
_computing_molecular_graphics     ? 
_computing_publication_material   ? 
 
_refine_special_details 
; 
 Refinement of F^2^ against ALL reflections.  The weighted R-factor wR and 
 goodness of fit S are based on F^2^, conventional R-factors R are based 
 on F, with F set to zero for negative F^2^. The threshold expression of 
 F^2^ > 2sigma(F^2^) is used only for calculating R-factors(gt) etc. and is 
 not relevant to the choice of reflections for refinement.  R-factors based 
 on F^2^ are statistically about twice as large as those based on F, and R- 
 factors based on ALL data will be even larger. 
; 
 
_refine_ls_structure_factor_coef  Fsqd  
_refine_ls_matrix_type            full 
_refine_ls_weighting_scheme       calc  
_refine_ls_weighting_details 
 'calc w=1/[\s^2^(Fo^2^)+(0.0628P)^2^+3.4068P] where P=(Fo^2^+2Fc^2^)/3' 
_atom_sites_solution_primary      direct 
_atom_sites_solution_secondary    difmap 
_atom_sites_solution_hydrogens    geom 
_refine_ls_hydrogen_treatment     mixed 
_refine_ls_extinction_method      none 
_refine_ls_extinction_coef        ? 
_refine_ls_number_reflns          8248 
_refine_ls_number_parameters      620 
_refine_ls_number_restraints      0 
_refine_ls_R_factor_all           0.0705 
_refine_ls_R_factor_gt            0.0570 
_refine_ls_wR_factor_ref          0.1460 
_refine_ls_wR_factor_gt           0.1330 
_refine_ls_goodness_of_fit_ref    1.231 
_refine_ls_restrained_S_all       1.231 
_refine_ls_shift/su_max           0.000 
_refine_ls_shift/su_mean          0.000 
 
loop_ 
 _atom_site_label 
 _atom_site_type_symbol 
 _atom_site_fract_x 
 _atom_site_fract_y 
 _atom_site_fract_z 
 _atom_site_U_iso_or_equiv 
 _atom_site_adp_type 
 _atom_site_occupancy 
 _atom_site_symmetry_multiplicity 
 _atom_site_calc_flag 
 _atom_site_refinement_flags 
 _atom_site_disorder_assembly 
 _atom_site_disorder_group 
Cr1 Cr 0.46880(5) 0.104377(16) 0.53044(5) 0.02185(15) Uani 1 1 d . . . 
Si2 Si 0.27587(8) 0.11111(3) 0.35175(8) 0.0207(2) Uani 1 1 d . . . 
Si3 Si 0.13020(10) 0.20882(3) -0.19673(9) 0.0297(2) Uani 1 1 d . . . 
Si4 Si 0.27301(9) 0.02719(3) 0.09606(9) 0.0273(2) Uani 1 1 d . . . 
Si5 Si 0.08510(8) 0.23130(3) 0.25307(9) 0.0263(2) Uani 1 1 d . . . 
Si6 Si -0.02831(9) 0.12520(3) -0.28067(8) 0.0264(2) Uani 1 1 d . . . 
Si7 Si -0.08945(8) 0.15139(3) 0.19176(9) 0.0261(2) Uani 1 1 d . . . 
Si8 Si 0.47328(9) 0.09406(3) 0.11873(9) 0.0318(3) Uani 1 1 d . . . 
C9 C 0.3435(3) 0.07951(10) 0.1488(3) 0.0203(7) Uani 1 1 d . . . 
C10 C 0.2488(3) 0.11198(9) 0.1148(3) 0.0191(7) Uani 1 1 d . . . 
C11 C 0.1001(3) 0.15333(10) -0.0428(3) 0.0192(7) Uani 1 1 d . . . 
C13 C 0.3004(3) 0.14162(12) 0.4784(3) 0.0286(8) Uani 1 1 d . . . 
C14 C 0.2098(3) 0.12815(10) 0.1963(3) 0.0187(7) Uani 1 1 d . A . 
C15 C 0.3190(3) 0.06145(11) 0.4135(3) 0.0245(7) Uani 1 1 d . . . 
C16 C 0.1934(3) 0.12538(10) -0.0015(3) 0.0195(7) Uani 1 1 d . . . 
C18 C 0.0396(3) 0.16767(10) -0.1691(3) 0.0227(7) Uani 1 1 d . . . 
C19 C 0.0624(3) 0.17386(11) 0.2325(3) 0.0224(7) Uani 1 1 d . A . 
C20 C 0.0638(3) 0.16816(10) 0.0382(3) 0.0211(7) Uani 1 1 d . A . 
C21 C 0.1149(3) 0.15623(10) 0.1557(3) 0.0193(7) Uani 1 1 d . . . 
C22 C 0.5156(3) 0.14069(12) 0.4489(3) 0.0346(9) Uani 1 1 d . . . 
C23 C 0.5794(3) 0.06629(11) 0.5387(3) 0.0275(8) Uani 1 1 d . . . 
C24 C 0.3547(3) 0.05354(12) 0.5343(3) 0.0281(8) Uani 1 1 d . . . 
C25 C -0.0247(4) 0.26205(14) 0.1275(4) 0.0426(11) Uani 1 1 d . . . 
C26 C 0.5821(3) 0.12685(11) 0.6674(3) 0.0323(9) Uani 1 1 d . . . 
C27 C 0.1390(4) 0.02263(12) 0.1209(4) 0.0335(9) Uani 1 1 d . . . 
C28 C 0.0735(4) 0.24641(13) 0.3889(4) 0.0438(10) Uani 1 1 d . . . 
H44 H 0.1363 0.2330 0.4573 0.066 Uiso 1 1 calc R . . 
H45 H -0.0039 0.2381 0.3820 0.066 Uiso 1 1 calc R . . 
H46 H 0.0820 0.2761 0.3988 0.066 Uiso 1 1 calc R . . 
C29 C 0.3629(3) 0.08294(13) 0.6174(3) 0.0321(9) Uani 1 1 d . . . 
O1 O 0.5452(3) 0.16475(10) 0.4009(3) 0.0597(9) Uani 1 1 d . . . 
C31 C 0.4925(4) 0.15078(14) 0.1252(4) 0.0470(11) Uani 1 1 d . . . 
H47 H 0.5074 0.1606 0.2035 0.071 Uiso 1 1 calc R . . 
H48 H 0.4204 0.1636 0.0655 0.071 Uiso 1 1 calc R . . 
H49 H 0.5596 0.1579 0.1098 0.071 Uiso 1 1 calc R . . 
C32 C 0.0746(4) 0.10305(14) -0.3345(4) 0.0353(9) Uani 1 1 d . . . 
C33 C -0.0793(4) 0.08422(13) -0.2118(4) 0.0351(9) Uani 1 1 d . . . 
C34 C 0.3823(4) -0.01324(12) 0.1819(4) 0.0452(11) Uani 1 1 d . . . 
H71 H 0.4139 -0.0075 0.2663 0.068 Uiso 1 1 calc R . . 
H72 H 0.4473 -0.0135 0.1597 0.068 Uiso 1 1 calc R . . 
H73 H 0.3431 -0.0399 0.1646 0.068 Uiso 1 1 calc R . . 
C35 C 0.2585(5) 0.18862(15) -0.2138(6) 0.0656(15) Uani 1 1 d . . . 
H50 H 0.3120 0.2111 -0.2081 0.098 Uiso 1 1 calc R . . 
H51 H 0.2307 0.1754 -0.2908 0.098 Uiso 1 1 calc R . . 
H52 H 0.3008 0.1687 -0.1514 0.098 Uiso 1 1 calc R . . 
C36 C -0.0906(14) 0.0958(4) 0.1457(15) 0.045(3) Uani 0.53(3) 1 d P A 2 
H77 H -0.0259 0.0809 0.2089 0.067 Uiso 0.53(3) 1 calc PR A 2 
H78 H -0.0801 0.0947 0.0738 0.067 Uiso 0.53(3) 1 calc PR A 2 
H79 H -0.1663 0.0832 0.1308 0.067 Uiso 0.53(3) 1 calc PR A 2 
C37 C 0.0311(5) 0.23677(17) -0.3336(4) 0.0700(17) Uani 1 1 d . . . 
H56 H 0.0738 0.2600 -0.3449 0.105 Uiso 1 1 calc R . . 
H57 H -0.0387 0.2467 -0.3265 0.105 Uiso 1 1 calc R . . 
H58 H 0.0060 0.2183 -0.4014 0.105 Uiso 1 1 calc R . . 
C38 C -0.1606(4) 0.14622(17) -0.4083(4) 0.0422(11) Uani 1 1 d . . . 
C39 C 0.2364(4) 0.24388(15) 0.2729(5) 0.0389(10) Uani 1 1 d . . . 
C40 C 0.1121(4) -0.00961(14) 0.5179(5) 0.0475(12) Uani 1 1 d . . . 
C41 C -0.0777(4) 0.01786(16) 0.3962(4) 0.0514(12) Uani 1 1 d . . . 
C42 C 0.3383(3) 0.12453(13) 0.5903(3) 0.0339(9) Uani 1 1 d . . . 
C43 C 0.4593(4) 0.07619(16) -0.0277(4) 0.0544(13) Uani 1 1 d . . . 
H59 H 0.5244 0.0875 -0.0406 0.082 Uiso 1 1 calc R . . 
H60 H 0.3836 0.0855 -0.0905 0.082 Uiso 1 1 calc R . . 
H61 H 0.4626 0.0463 -0.0283 0.082 Uiso 1 1 calc R . . 
C44 C 0.2236(5) 0.01673(16) -0.0640(4) 0.0446(12) Uani 1 1 d . . . 
C45 C 0.6083(4) 0.06992(16) 0.2350(4) 0.0560(13) Uani 1 1 d . . . 
H74 H 0.6769 0.0770 0.2221 0.084 Uiso 1 1 calc R . . 
H75 H 0.5983 0.0402 0.2317 0.084 Uiso 1 1 calc R . . 
H76 H 0.6207 0.0799 0.3126 0.084 Uiso 1 1 calc R . . 
C46 C 0.0360(5) 0.00795(16) 0.4152(5) 0.0536(13) Uani 1 1 d . . . 
C47 C 0.1873(5) 0.24523(13) -0.0705(4) 0.0496(12) Uani 1 1 d . . . 
H62 H 0.2433 0.2311 0.0008 0.074 Uiso 1 1 calc R . . 
H63 H 0.1211 0.2558 -0.0581 0.074 Uiso 1 1 calc R . . 
H64 H 0.2275 0.2680 -0.0879 0.074 Uiso 1 1 calc R . . 
C48 C -0.1945(15) 0.1633(7) 0.0400(14) 0.053(5) Uani 0.47(3) 1 d P A 1 
H80 H -0.1697 0.1498 -0.0142 0.080 Uiso 0.47(3) 1 calc PR A 1 
H81 H -0.1968 0.1929 0.0279 0.080 Uiso 0.47(3) 1 calc PR A 1 
H82 H -0.2735 0.1536 0.0248 0.080 Uiso 0.47(3) 1 calc PR A 1 
C49 C -0.1452(11) 0.1722(6) 0.2943(13) 0.042(4) Uani 0.47(3) 1 d P A 1 
H83 H -0.2166 0.1573 0.2837 0.062 Uiso 0.47(3) 1 calc PR A 1 
H84 H -0.1643 0.2012 0.2774 0.062 Uiso 0.47(3) 1 calc PR A 1 
H85 H -0.0842 0.1690 0.3758 0.062 Uiso 0.47(3) 1 calc PR A 1 
O2 O 0.6493(2) 0.04237(8) 0.5447(3) 0.0394(7) Uani 1 1 d . . . 
O3 O 0.6544(3) 0.14059(9) 0.7538(3) 0.0495(8) Uani 1 1 d . . . 
H8 H 0.242(4) 0.2400(13) 0.216(4) 0.033(13) Uiso 1 1 d . . . 
H1 H 0.188(5) -0.0170(15) 0.545(4) 0.063(15) Uiso 1 1 d . . . 
H9 H 0.304(5) 0.2293(16) 0.338(5) 0.071(16) Uiso 1 1 d . . . 
H7 H 0.004(3) 0.1860(11) 0.011(3) 0.020(9) Uiso 1 1 d . . . 
H3 H 0.376(3) 0.0279(12) 0.562(3) 0.031(10) Uiso 1 1 d . . . 
H2 H 0.052(5) 0.0122(18) 0.357(5) 0.083(19) Uiso 1 1 d . . . 
H10 H 0.244(4) 0.2719(16) 0.281(4) 0.050(13) Uiso 1 1 d . . . 
H15 H 0.109(4) -0.0038(14) 0.097(4) 0.040(11) Uiso 1 1 d . . . 
H23 H -0.028(4) 0.1806(13) -0.178(4) 0.046(12) Uiso 1 1 d . . . 
H34 H -0.023(5) 0.2580(16) 0.051(5) 0.072(17) Uiso 1 1 d . . . 
H16 H 0.154(4) 0.0273(13) 0.202(4) 0.041(12) Uiso 1 1 d . . . 
H28 H -0.133(4) 0.0962(12) -0.187(4) 0.036(11) Uiso 1 1 d . . . 
H29 H -0.120(4) 0.0633(15) -0.263(4) 0.053(14) Uiso 1 1 d . . . 
H31 H -0.192(5) 0.1262(17) -0.456(5) 0.065(17) Uiso 1 1 d . . . 
H30 H -0.016(4) 0.0699(13) -0.151(4) 0.043(12) Uiso 1 1 d . . . 
H37 H 0.293(5) 0.0096(15) -0.076(4) 0.060(15) Uiso 1 1 d . . . 
H32 H -0.214(5) 0.1599(15) -0.377(4) 0.065(15) Uiso 1 1 d . . . 
H19 H 0.081(4) 0.0416(14) 0.074(4) 0.052(13) Uiso 1 1 d . . . 
H35 H -0.099(5) 0.2567(15) 0.113(4) 0.061(16) Uiso 1 1 d . . . 
H11 H 0.387(3) 0.0751(11) 0.695(3) 0.022(9) Uiso 1 1 d . . . 
H12 H 0.300(3) 0.1714(13) 0.479(3) 0.035(11) Uiso 1 1 d . . . 
H14 H 0.329(4) 0.0406(14) 0.372(4) 0.045(12) Uiso 1 1 d . . . 
H38 H 0.171(5) -0.0073(17) -0.081(4) 0.072(16) Uiso 1 1 d . . . 
H24 H 0.218(3) 0.1152(9) -0.056(3) 0.007(7) Uiso 1 1 d . . . 
H43 H -0.131(5) 0.0297(17) 0.330(5) 0.076(18) Uiso 1 1 d . . . 
H25 H 0.041(4) 0.0786(14) -0.385(4) 0.045(12) Uiso 1 1 d . . . 
H33 H -0.140(5) 0.1657(16) -0.450(4) 0.066(16) Uiso 1 1 d . . . 
H22 H 0.098(3) 0.1671(11) 0.301(3) 0.025(10) Uiso 1 1 d . . . 
H36 H 0.003(5) 0.2869(17) 0.157(5) 0.069(16) Uiso 1 1 d . . . 
H39 H 0.193(5) 0.0341(17) -0.095(5) 0.061(19) Uiso 1 1 d . . . 
H26 H 0.088(4) 0.1219(14) -0.376(4) 0.040(12) Uiso 1 1 d . . . 
H27 H 0.149(5) 0.0938(15) -0.280(4) 0.061(15) Uiso 1 1 d . . . 
H21 H 0.384(3) 0.0770(11) 0.227(3) 0.028(10) Uiso 1 1 d . . . 
H13 H 0.357(4) 0.1427(12) 0.646(4) 0.035(11) Uiso 1 1 d . . . 
C50 C -0.0691(18) 0.0964(6) 0.211(3) 0.070(6) Uani 0.47(3) 1 d P A 1 
H86 H -0.1466 0.0830 0.1793 0.105 Uiso 0.47(3) 1 calc PR A 1 
H87 H -0.0244 0.0900 0.2950 0.105 Uiso 0.47(3) 1 calc PR A 1 
H88 H -0.0253 0.0865 0.1688 0.105 Uiso 0.47(3) 1 calc PR A 1 
C51 C -0.2170(11) 0.1759(5) 0.0667(16) 0.046(4) Uani 0.53(3) 1 d P A 2 
H89 H -0.1968 0.1806 0.0016 0.070 Uiso 0.53(3) 1 calc PR A 2 
H90 H -0.2351 0.2021 0.0925 0.070 Uiso 0.53(3) 1 calc PR A 2 
H91 H -0.2863 0.1579 0.0401 0.070 Uiso 0.53(3) 1 calc PR A 2 
C52 C -0.1168(14) 0.1507(6) 0.3235(12) 0.053(3) Uani 0.53(3) 1 d P A 2 
H92 H -0.1945 0.1385 0.3028 0.079 Uiso 0.53(3) 1 calc PR A 2 
H93 H -0.1152 0.1786 0.3515 0.079 Uiso 0.53(3) 1 calc PR A 2 
H94 H -0.0553 0.1344 0.3857 0.079 Uiso 0.53(3) 1 calc PR A 2 
 
loop_ 
 _atom_site_aniso_label 
 _atom_site_aniso_U_11 
 _atom_site_aniso_U_22 
 _atom_site_aniso_U_33 
 _atom_site_aniso_U_23 
 _atom_site_aniso_U_13 
 _atom_site_aniso_U_12 
Cr1 0.0177(3) 0.0221(3) 0.0207(3) -0.0016(2) 0.0040(2) 0.0027(2) 
Si2 0.0172(4) 0.0230(5) 0.0185(5) -0.0012(4) 0.0050(4) 0.0029(4) 
Si3 0.0378(6) 0.0253(5) 0.0306(6) 0.0022(4) 0.0194(5) -0.0025(4) 
Si4 0.0319(5) 0.0203(5) 0.0230(5) -0.0019(4) 0.0065(4) 0.0044(4) 
Si5 0.0213(5) 0.0280(5) 0.0271(5) -0.0054(4) 0.0086(4) 0.0023(4) 
Si6 0.0232(5) 0.0322(5) 0.0198(5) 0.0019(4) 0.0061(4) -0.0043(4) 
Si7 0.0217(5) 0.0311(5) 0.0278(5) 0.0004(4) 0.0132(4) 0.0017(4) 
Si8 0.0204(5) 0.0431(6) 0.0336(6) -0.0032(5) 0.0137(5) 0.0056(4) 
C9 0.0161(16) 0.0195(17) 0.0210(18) -0.0052(13) 0.0044(15) 0.0039(13) 
C10 0.0135(15) 0.0185(16) 0.0232(17) -0.0040(13) 0.0064(14) -0.0028(12) 
C11 0.0150(16) 0.0193(16) 0.0220(17) -0.0004(13) 0.0071(14) -0.0040(12) 
C13 0.0210(18) 0.036(2) 0.0244(19) -0.0065(15) 0.0059(15) 0.0092(15) 
C14 0.0134(15) 0.0207(16) 0.0198(17) -0.0010(13) 0.0053(13) -0.0019(12) 
C15 0.0186(17) 0.0283(19) 0.0233(19) -0.0012(15) 0.0065(15) -0.0006(14) 
C16 0.0187(16) 0.0215(17) 0.0196(17) -0.0040(13) 0.0098(14) -0.0018(13) 
C18 0.0226(18) 0.0248(18) 0.0236(18) 0.0046(14) 0.0130(15) 0.0034(14) 
C19 0.0167(16) 0.0315(19) 0.0162(18) 0.0033(14) 0.0049(15) 0.0072(14) 
C20 0.0131(16) 0.0209(17) 0.0257(18) 0.0016(14) 0.0057(14) 0.0037(13) 
C21 0.0159(16) 0.0199(16) 0.0206(17) -0.0014(13) 0.0066(14) 0.0002(13) 
C22 0.0232(19) 0.035(2) 0.034(2) 0.0063(17) 0.0020(17) -0.0025(16) 
C23 0.0239(18) 0.0287(19) 0.0266(19) -0.0033(15) 0.0083(16) -0.0020(16) 
C24 0.0230(18) 0.032(2) 0.027(2) 0.0064(16) 0.0091(16) -0.0006(15) 
C25 0.039(3) 0.026(2) 0.045(3) 0.0043(19) 0.003(2) 0.0026(19) 
C26 0.0233(19) 0.034(2) 0.030(2) -0.0047(16) 0.0028(17) 0.0083(16) 
C27 0.032(2) 0.025(2) 0.031(2) -0.0047(17) 0.0035(18) -0.0103(17) 
C28 0.046(2) 0.044(2) 0.044(3) -0.0116(19) 0.023(2) 0.007(2) 
C29 0.0237(19) 0.050(2) 0.0201(19) 0.0043(17) 0.0077(16) 0.0035(17) 
O1 0.0461(19) 0.061(2) 0.055(2) 0.0203(17) 0.0073(16) -0.0192(16) 
C31 0.029(2) 0.052(3) 0.063(3) -0.009(2) 0.024(2) -0.0113(19) 
C32 0.040(2) 0.035(2) 0.032(2) -0.0088(19) 0.017(2) -0.0042(19) 
C33 0.033(2) 0.036(2) 0.031(2) 0.0057(18) 0.010(2) -0.0082(19) 
C34 0.055(3) 0.032(2) 0.042(3) 0.0017(18) 0.017(2) 0.016(2) 
C35 0.065(3) 0.049(3) 0.116(5) -0.013(3) 0.070(3) -0.016(2) 
C36 0.047(6) 0.028(5) 0.071(9) -0.008(6) 0.036(7) -0.010(4) 
C37 0.081(4) 0.068(4) 0.049(3) 0.032(3) 0.019(3) -0.013(3) 
C38 0.033(2) 0.057(3) 0.025(2) 0.008(2) 0.0031(19) -0.003(2) 
C39 0.034(2) 0.042(3) 0.043(3) -0.011(2) 0.019(2) -0.0061(19) 
C40 0.027(2) 0.043(3) 0.073(3) -0.008(2) 0.023(2) -0.0020(19) 
C41 0.043(3) 0.061(3) 0.039(3) -0.002(2) 0.008(2) 0.007(2) 
C42 0.026(2) 0.050(2) 0.022(2) -0.0089(18) 0.0070(16) 0.0088(17) 
C43 0.051(3) 0.076(3) 0.050(3) -0.012(2) 0.035(2) 0.002(2) 
C44 0.066(3) 0.031(2) 0.030(2) -0.005(2) 0.015(2) 0.000(2) 
C45 0.019(2) 0.077(3) 0.067(3) 0.009(3) 0.014(2) 0.017(2) 
C46 0.059(3) 0.059(3) 0.060(3) 0.003(2) 0.043(3) 0.008(2) 
C47 0.074(3) 0.032(2) 0.052(3) -0.0071(19) 0.037(3) -0.014(2) 
C48 0.015(7) 0.106(15) 0.039(7) 0.001(7) 0.012(5) -0.013(7) 
C49 0.028(6) 0.067(10) 0.039(7) -0.020(6) 0.024(5) -0.013(6) 
O2 0.0307(15) 0.0349(15) 0.0521(18) -0.0027(13) 0.0180(14) 0.0100(12) 
O3 0.0363(16) 0.0537(19) 0.0378(17) -0.0194(14) -0.0020(14) 0.0010(14) 
C50 0.051(10) 0.049(8) 0.135(18) 0.010(12) 0.065(13) -0.001(7) 
C51 0.013(5) 0.068(8) 0.059(9) 0.027(6) 0.017(5) 0.004(5) 
C52 0.059(8) 0.055(9) 0.058(7) -0.003(6) 0.038(6) -0.014(6) 
 
_geom_special_details 
; 
 All esds (except the esd in the dihedral angle between two l.s. planes) 
 are estimated using the full covariance matrix.  The cell esds are taken 
 into account individually in the estimation of esds in distances, angles 
 and torsion angles; correlations between esds in cell parameters are only 
 used when they are defined by crystal symmetry.  An approximate (isotropic) 
 treatment of cell esds is used for estimating esds involving l.s. planes. 
; 
 
loop_ 
 _geom_bond_atom_site_label_1 
 _geom_bond_atom_site_label_2 
 _geom_bond_distance 
 _geom_bond_site_symmetry_2 
 _geom_bond_publ_flag 
Cr1 C22 1.839(4) . ? 
Cr1 C26 1.840(4) . ? 
Cr1 C23 1.840(4) . ? 
Cr1 C29 2.196(4) . ? 
Cr1 C42 2.203(4) . ? 
Cr1 C24 2.217(4) . ? 
Cr1 C13 2.278(4) . ? 
Cr1 C15 2.290(4) . ? 
Cr1 Si2 2.4864(13) . ? 
Si2 C15 1.781(4) . ? 
Si2 C13 1.797(4) . ? 
Si2 C14 1.850(3) . ? 
Si3 C35 1.851(5) . ? 
Si3 C47 1.863(4) . ? 
Si3 C37 1.864(5) . ? 
Si3 C18 1.900(4) . ? 
Si4 C27 1.861(4) . ? 
Si4 C44 1.870(5) . ? 
Si4 C34 1.871(4) . ? 
Si4 C9 1.908(3) . ? 
Si5 C39 1.859(4) . ? 
Si5 C28 1.861(4) . ? 
Si5 C25 1.870(4) . ? 
Si5 C19 1.903(4) . ? 
Si6 C38 1.861(4) . ? 
Si6 C32 1.865(4) . ? 
Si6 C33 1.866(4) . ? 
Si6 C18 1.894(4) . ? 
Si7 C50 1.820(18) . ? 
Si7 C48 1.826(17) . ? 
Si7 C52 1.853(11) . ? 
Si7 C51 1.863(13) . ? 
Si7 C49 1.865(10) . ? 
Si7 C19 1.898(4) . ? 
Si7 C36 1.910(14) . ? 
Si8 C45 1.859(4) . ? 
Si8 C31 1.870(5) . ? 
Si8 C43 1.879(4) . ? 
Si8 C9 1.903(4) . ? 
C9 C10 1.511(4) . ? 
C10 C16 1.391(5) . ? 
C10 C14 1.433(5) . ? 
C11 C20 1.388(5) . ? 
C11 C16 1.395(5) . ? 
C11 C18 1.508(5) . ? 
C13 C42 1.397(5) . ? 
C14 C21 1.412(4) . ? 
C15 C24 1.414(5) . ? 
C19 C21 1.517(5) . ? 
C20 C21 1.389(5) . ? 
C22 O1 1.156(5) . ? 
C23 O2 1.157(4) . ? 
C24 C29 1.397(5) . ? 
C26 O3 1.158(4) . ? 
C29 C42 1.405(6) . ? 
C40 C46 1.353(7) . ? 
C40 C41 1.369(7) 3_556 ? 
C41 C40 1.369(7) 3_556 ? 
C41 C46 1.384(7) . ? 
 
loop_ 
 _geom_angle_atom_site_label_1 
 _geom_angle_atom_site_label_2 
 _geom_angle_atom_site_label_3 
 _geom_angle 
 _geom_angle_site_symmetry_1 
 _geom_angle_site_symmetry_3 
 _geom_angle_publ_flag 
C22 Cr1 C26 87.86(18) . . ? 
C22 Cr1 C23 92.45(17) . . ? 
C26 Cr1 C23 88.12(16) . . ? 
C22 Cr1 C29 155.66(16) . . ? 
C26 Cr1 C29 92.56(17) . . ? 
C23 Cr1 C29 111.90(16) . . ? 
C22 Cr1 C42 118.64(17) . . ? 
C26 Cr1 C42 86.58(16) . . ? 
C23 Cr1 C42 148.19(16) . . ? 
C29 Cr1 C42 37.24(15) . . ? 
C22 Cr1 C24 150.93(15) . . ? 
C26 Cr1 C24 121.21(16) . . ? 
C23 Cr1 C24 88.56(15) . . ? 
C29 Cr1 C24 36.91(14) . . ? 
C42 Cr1 C24 67.84(15) . . ? 
C22 Cr1 C13 89.12(16) . . ? 
C26 Cr1 C13 106.90(15) . . ? 
C23 Cr1 C13 164.95(14) . . ? 
C29 Cr1 C13 67.47(15) . . ? 
C42 Cr1 C13 36.28(14) . . ? 
C24 Cr1 C13 82.88(15) . . ? 
C22 Cr1 C15 114.40(15) . . ? 
C26 Cr1 C15 157.74(16) . . ? 
C23 Cr1 C15 90.41(14) . . ? 
C29 Cr1 C15 67.45(14) . . ? 
C42 Cr1 C15 83.01(15) . . ? 
C24 Cr1 C15 36.53(13) . . ? 
C13 Cr1 C15 75.35(14) . . ? 
C22 Cr1 Si2 81.99(12) . . ? 
C26 Cr1 Si2 148.95(12) . . ? 
C23 Cr1 Si2 121.42(11) . . ? 
C29 Cr1 Si2 85.26(11) . . ? 
C42 Cr1 Si2 73.05(11) . . ? 
C24 Cr1 Si2 72.83(10) . . ? 
C13 Cr1 Si2 44.04(9) . . ? 
C15 Cr1 Si2 43.55(9) . . ? 
C15 Si2 C13 102.56(18) . . ? 
C15 Si2 C14 130.36(16) . . ? 
C13 Si2 C14 126.89(17) . . ? 
C15 Si2 Cr1 62.34(11) . . ? 
C13 Si2 Cr1 61.80(11) . . ? 
C14 Si2 Cr1 142.10(11) . . ? 
C35 Si3 C47 107.9(2) . . ? 
C35 Si3 C37 108.9(3) . . ? 
C47 Si3 C37 109.1(2) . . ? 
C35 Si3 C18 113.58(19) . . ? 
C47 Si3 C18 109.16(18) . . ? 
C37 Si3 C18 108.1(2) . . ? 
C27 Si4 C44 106.4(2) . . ? 
C27 Si4 C34 109.6(2) . . ? 
C44 Si4 C34 107.6(2) . . ? 
C27 Si4 C9 109.24(17) . . ? 
C44 Si4 C9 114.9(2) . . ? 
C34 Si4 C9 108.91(18) . . ? 
C39 Si5 C28 108.6(2) . . ? 
C39 Si5 C25 108.7(2) . . ? 
C28 Si5 C25 108.1(2) . . ? 
C39 Si5 C19 108.65(19) . . ? 
C28 Si5 C19 108.70(18) . . ? 
C25 Si5 C19 113.98(19) . . ? 
C38 Si6 C32 109.1(2) . . ? 
C38 Si6 C33 108.0(2) . . ? 
C32 Si6 C33 109.6(2) . . ? 
C38 Si6 C18 108.0(2) . . ? 
C32 Si6 C18 113.74(18) . . ? 
C33 Si6 C18 108.26(18) . . ? 
C50 Si7 C48 110.2(9) . . ? 
C50 Si7 C52 86.5(7) . . ? 
C48 Si7 C52 127.8(6) . . ? 
C50 Si7 C51 123.8(8) . . ? 
C48 Si7 C51 21.0(5) . . ? 
C52 Si7 C51 109.6(5) . . ? 
C50 Si7 C49 110.1(7) . . ? 
C48 Si7 C49 109.6(6) . . ? 
C52 Si7 C49 24.9(4) . . ? 
C51 Si7 C49 89.1(5) . . ? 
C50 Si7 C19 106.4(6) . . ? 
C48 Si7 C19 111.9(5) . . ? 
C52 Si7 C19 109.5(4) . . ? 
C51 Si7 C19 116.7(4) . . ? 
C49 Si7 C19 108.7(4) . . ? 
C50 Si7 C36 22.9(7) . . ? 
C48 Si7 C36 88.8(7) . . ? 
C52 Si7 C36 106.6(5) . . ? 
C51 Si7 C36 105.3(6) . . ? 
C49 Si7 C36 127.5(6) . . ? 
C19 Si7 C36 108.7(5) . . ? 
C45 Si8 C31 109.4(2) . . ? 
C45 Si8 C43 107.4(2) . . ? 
C31 Si8 C43 107.8(2) . . ? 
C45 Si8 C9 107.52(19) . . ? 
C31 Si8 C9 110.27(17) . . ? 
C43 Si8 C9 114.33(19) . . ? 
C10 C9 Si8 114.2(2) . . ? 
C10 C9 Si4 110.2(2) . . ? 
Si8 C9 Si4 117.59(17) . . ? 
C16 C10 C14 118.5(3) . . ? 
C16 C10 C9 118.9(3) . . ? 
C14 C10 C9 122.6(3) . . ? 
C20 C11 C16 117.0(3) . . ? 
C20 C11 C18 120.0(3) . . ? 
C16 C11 C18 123.0(3) . . ? 
C42 C13 Si2 122.0(3) . . ? 
C42 C13 Cr1 68.9(2) . . ? 
Si2 C13 Cr1 74.16(12) . . ? 
C21 C14 C10 119.1(3) . . ? 
C21 C14 Si2 119.3(2) . . ? 
C10 C14 Si2 121.4(2) . . ? 
C24 C15 Si2 122.0(3) . . ? 
C24 C15 Cr1 68.9(2) . . ? 
Si2 C15 Cr1 74.11(13) . . ? 
C10 C16 C11 123.1(3) . . ? 
C11 C18 Si6 114.2(2) . . ? 
C11 C18 Si3 110.9(2) . . ? 
Si6 C18 Si3 119.41(18) . . ? 
C21 C19 Si7 110.9(2) . . ? 
C21 C19 Si5 112.5(2) . . ? 
Si7 C19 Si5 119.48(17) . . ? 
C11 C20 C21 123.2(3) . . ? 
C20 C21 C14 119.1(3) . . ? 
C20 C21 C19 117.1(3) . . ? 
C14 C21 C19 123.8(3) . . ? 
O1 C22 Cr1 177.2(4) . . ? 
O2 C23 Cr1 179.5(3) . . ? 
C29 C24 C15 124.9(4) . . ? 
C29 C24 Cr1 70.7(2) . . ? 
C15 C24 Cr1 74.5(2) . . ? 
O3 C26 Cr1 179.1(3) . . ? 
C24 C29 C42 123.3(4) . . ? 
C24 C29 Cr1 72.3(2) . . ? 
C42 C29 Cr1 71.6(2) . . ? 
C46 C40 C41 120.6(4) . 3_556 ? 
C40 C41 C46 119.3(5) 3_556 . ? 
C13 C42 C29 125.1(4) . . ? 
C13 C42 Cr1 74.8(2) . . ? 
C29 C42 Cr1 71.1(2) . . ? 
C40 C46 C41 120.1(5) . . ? 
 
loop_ 
 _geom_torsion_atom_site_label_1 
 _geom_torsion_atom_site_label_2 
 _geom_torsion_atom_site_label_3 
 _geom_torsion_atom_site_label_4 
 _geom_torsion 
 _geom_torsion_site_symmetry_1 
 _geom_torsion_site_symmetry_2 
 _geom_torsion_site_symmetry_3 
 _geom_torsion_site_symmetry_4 
 _geom_torsion_publ_flag 
C22 Cr1 Si2 C15 138.89(19) . . . . ? 
C26 Cr1 Si2 C15 -149.0(3) . . . . ? 
C23 Cr1 Si2 C15 50.92(19) . . . . ? 
C29 Cr1 Si2 C15 -61.89(17) . . . . ? 
C42 Cr1 Si2 C15 -97.81(18) . . . . ? 
C24 Cr1 Si2 C15 -26.40(17) . . . . ? 
C13 Cr1 Si2 C15 -124.0(2) . . . . ? 
C22 Cr1 Si2 C13 -97.1(2) . . . . ? 
C26 Cr1 Si2 C13 -24.9(3) . . . . ? 
C23 Cr1 Si2 C13 175.0(2) . . . . ? 
C29 Cr1 Si2 C13 62.14(19) . . . . ? 
C42 Cr1 Si2 C13 26.22(19) . . . . ? 
C24 Cr1 Si2 C13 97.64(19) . . . . ? 
C15 Cr1 Si2 C13 124.0(2) . . . . ? 
C22 Cr1 Si2 C14 17.8(2) . . . . ? 
C26 Cr1 Si2 C14 89.9(3) . . . . ? 
C23 Cr1 Si2 C14 -70.2(2) . . . . ? 
C29 Cr1 Si2 C14 177.0(2) . . . . ? 
C42 Cr1 Si2 C14 141.1(2) . . . . ? 
C24 Cr1 Si2 C14 -147.5(2) . . . . ? 
C13 Cr1 Si2 C14 114.8(2) . . . . ? 
C15 Cr1 Si2 C14 -121.1(2) . . . . ? 
C45 Si8 C9 C10 147.0(3) . . . . ? 
C31 Si8 C9 C10 27.8(3) . . . . ? 
C43 Si8 C9 C10 -93.9(3) . . . . ? 
C45 Si8 C9 Si4 -81.5(3) . . . . ? 
C31 Si8 C9 Si4 159.2(2) . . . . ? 
C43 Si8 C9 Si4 37.6(3) . . . . ? 
C27 Si4 C9 C10 -40.6(3) . . . . ? 
C44 Si4 C9 C10 78.9(3) . . . . ? 
C34 Si4 C9 C10 -160.3(3) . . . . ? 
C27 Si4 C9 Si8 -173.9(2) . . . . ? 
C44 Si4 C9 Si8 -54.3(3) . . . . ? 
C34 Si4 C9 Si8 66.5(3) . . . . ? 
Si8 C9 C10 C16 58.3(4) . . . . ? 
Si4 C9 C10 C16 -76.6(3) . . . . ? 
Si8 C9 C10 C14 -124.8(3) . . . . ? 
Si4 C9 C10 C14 100.3(3) . . . . ? 
C15 Si2 C13 C42 -3.0(4) . . . . ? 
C14 Si2 C13 C42 172.4(3) . . . . ? 
Cr1 Si2 C13 C42 -51.8(3) . . . . ? 
C15 Si2 C13 Cr1 48.77(15) . . . . ? 
C14 Si2 C13 Cr1 -135.81(15) . . . . ? 
C22 Cr1 C13 C42 -146.2(3) . . . . ? 
C26 Cr1 C13 C42 -58.7(3) . . . . ? 
C23 Cr1 C13 C42 117.6(6) . . . . ? 
C29 Cr1 C13 C42 27.0(2) . . . . ? 
C24 Cr1 C13 C42 61.8(2) . . . . ? 
C15 Cr1 C13 C42 98.3(3) . . . . ? 
Si2 Cr1 C13 C42 134.4(3) . . . . ? 
C22 Cr1 C13 Si2 79.36(17) . . . . ? 
C26 Cr1 C13 Si2 166.86(16) . . . . ? 
C23 Cr1 C13 Si2 -16.8(7) . . . . ? 
C29 Cr1 C13 Si2 -107.47(17) . . . . ? 
C42 Cr1 C13 Si2 -134.4(3) . . . . ? 
C24 Cr1 C13 Si2 -72.62(15) . . . . ? 
C15 Cr1 C13 Si2 -36.17(13) . . . . ? 
C16 C10 C14 C21 1.5(4) . . . . ? 
C9 C10 C14 C21 -175.4(3) . . . . ? 
C16 C10 C14 Si2 178.4(2) . . . . ? 
C9 C10 C14 Si2 1.5(4) . . . . ? 
C15 Si2 C14 C21 136.3(3) . . . . ? 
C13 Si2 C14 C21 -37.8(3) . . . . ? 
Cr1 Si2 C14 C21 -128.0(2) . . . . ? 
C15 Si2 C14 C10 -40.6(3) . . . . ? 
C13 Si2 C14 C10 145.3(3) . . . . ? 
Cr1 Si2 C14 C10 55.1(3) . . . . ? 
C13 Si2 C15 C24 3.3(3) . . . . ? 
C14 Si2 C15 C24 -171.9(3) . . . . ? 
Cr1 Si2 C15 C24 51.8(3) . . . . ? 
C13 Si2 C15 Cr1 -48.44(15) . . . . ? 
C14 Si2 C15 Cr1 136.36(16) . . . . ? 
C22 Cr1 C15 C24 179.9(2) . . . . ? 
C26 Cr1 C15 C24 1.0(5) . . . . ? 
C23 Cr1 C15 C24 87.0(2) . . . . ? 
C29 Cr1 C15 C24 -26.6(2) . . . . ? 
C42 Cr1 C15 C24 -61.8(2) . . . . ? 
C13 Cr1 C15 C24 -97.9(2) . . . . ? 
Si2 Cr1 C15 C24 -134.5(3) . . . . ? 
C22 Cr1 C15 Si2 -45.63(19) . . . . ? 
C26 Cr1 C15 Si2 135.4(3) . . . . ? 
C23 Cr1 C15 Si2 -138.51(15) . . . . ? 
C29 Cr1 C15 Si2 107.86(16) . . . . ? 
C42 Cr1 C15 Si2 72.70(15) . . . . ? 
C24 Cr1 C15 Si2 134.5(3) . . . . ? 
C13 Cr1 C15 Si2 36.55(13) . . . . ? 
C14 C10 C16 C11 -1.1(5) . . . . ? 
C9 C10 C16 C11 175.9(3) . . . . ? 
C20 C11 C16 C10 0.6(5) . . . . ? 
C18 C11 C16 C10 -179.7(3) . . . . ? 
C20 C11 C18 Si6 -121.8(3) . . . . ? 
C16 C11 C18 Si6 58.4(4) . . . . ? 
C20 C11 C18 Si3 99.8(3) . . . . ? 
C16 C11 C18 Si3 -80.0(3) . . . . ? 
C38 Si6 C18 C11 149.0(3) . . . . ? 
C32 Si6 C18 C11 -89.9(3) . . . . ? 
C33 Si6 C18 C11 32.2(3) . . . . ? 
C38 Si6 C18 Si3 -76.4(3) . . . . ? 
C32 Si6 C18 Si3 44.8(3) . . . . ? 
C33 Si6 C18 Si3 166.8(2) . . . . ? 
C35 Si3 C18 C11 77.6(3) . . . . ? 
C47 Si3 C18 C11 -42.8(3) . . . . ? 
C37 Si3 C18 C11 -161.3(3) . . . . ? 
C35 Si3 C18 Si6 -58.4(3) . . . . ? 
C47 Si3 C18 Si6 -178.7(2) . . . . ? 
C37 Si3 C18 Si6 62.7(3) . . . . ? 
C50 Si7 C19 C21 58.5(10) . . . . ? 
C48 Si7 C19 C21 -61.8(9) . . . . ? 
C52 Si7 C19 C21 150.6(7) . . . . ? 
C51 Si7 C19 C21 -84.3(7) . . . . ? 
C49 Si7 C19 C21 177.0(8) . . . . ? 
C36 Si7 C19 C21 34.6(6) . . . . ? 
C50 Si7 C19 Si5 -168.1(10) . . . . ? 
C48 Si7 C19 Si5 71.5(8) . . . . ? 
C52 Si7 C19 Si5 -76.0(7) . . . . ? 
C51 Si7 C19 Si5 49.1(8) . . . . ? 
C49 Si7 C19 Si5 -49.6(8) . . . . ? 
C36 Si7 C19 Si5 167.9(6) . . . . ? 
C39 Si5 C19 C21 -40.1(3) . . . . ? 
C28 Si5 C19 C21 -158.1(2) . . . . ? 
C25 Si5 C19 C21 81.4(3) . . . . ? 
C39 Si5 C19 Si7 -172.7(2) . . . . ? 
C28 Si5 C19 Si7 69.3(3) . . . . ? 
C25 Si5 C19 Si7 -51.3(3) . . . . ? 
C16 C11 C20 C21 -0.5(5) . . . . ? 
C18 C11 C20 C21 179.7(3) . . . . ? 
C11 C20 C21 C14 1.0(5) . . . . ? 
C11 C20 C21 C19 -177.7(3) . . . . ? 
C10 C14 C21 C20 -1.5(5) . . . . ? 
Si2 C14 C21 C20 -178.5(2) . . . . ? 
C10 C14 C21 C19 177.1(3) . . . . ? 
Si2 C14 C21 C19 0.1(4) . . . . ? 
Si7 C19 C21 C20 70.8(3) . . . . ? 
Si5 C19 C21 C20 -65.9(3) . . . . ? 
Si7 C19 C21 C14 -107.8(3) . . . . ? 
Si5 C19 C21 C14 115.4(3) . . . . ? 
C26 Cr1 C22 O1 -43(7) . . . . ? 
C23 Cr1 C22 O1 -131(7) . . . . ? 
C29 Cr1 C22 O1 48(7) . . . . ? 
C42 Cr1 C22 O1 41(7) . . . . ? 
C24 Cr1 C22 O1 137(7) . . . . ? 
C13 Cr1 C22 O1 64(7) . . . . ? 
C15 Cr1 C22 O1 137(7) . . . . ? 
Si2 Cr1 C22 O1 107(7) . . . . ? 
C22 Cr1 C23 O2 118(39) . . . . ? 
C26 Cr1 C23 O2 30(39) . . . . ? 
C29 Cr1 C23 O2 -62(39) . . . . ? 
C42 Cr1 C23 O2 -51(39) . . . . ? 
C24 Cr1 C23 O2 -92(39) . . . . ? 
C13 Cr1 C23 O2 -147(100) . . . . ? 
C15 Cr1 C23 O2 -128(39) . . . . ? 
Si2 Cr1 C23 O2 -160(100) . . . . ? 
Si2 C15 C24 C29 -1.6(5) . . . . ? 
Cr1 C15 C24 C29 52.4(3) . . . . ? 
Si2 C15 C24 Cr1 -54.1(2) . . . . ? 
C22 Cr1 C24 C29 -136.7(3) . . . . ? 
C26 Cr1 C24 C29 44.0(3) . . . . ? 
C23 Cr1 C24 C29 130.9(2) . . . . ? 
C42 Cr1 C24 C29 -27.2(2) . . . . ? 
C13 Cr1 C24 C29 -61.5(2) . . . . ? 
C15 Cr1 C24 C29 -136.5(3) . . . . ? 
Si2 Cr1 C24 C29 -105.5(2) . . . . ? 
C22 Cr1 C24 C15 -0.2(4) . . . . ? 
C26 Cr1 C24 C15 -179.6(2) . . . . ? 
C23 Cr1 C24 C15 -92.6(2) . . . . ? 
C29 Cr1 C24 C15 136.5(3) . . . . ? 
C42 Cr1 C24 C15 109.2(2) . . . . ? 
C13 Cr1 C24 C15 74.9(2) . . . . ? 
Si2 Cr1 C24 C15 30.97(19) . . . . ? 
C22 Cr1 C26 O3 -99(34) . . . . ? 
C23 Cr1 C26 O3 -6(34) . . . . ? 
C29 Cr1 C26 O3 106(34) . . . . ? 
C42 Cr1 C26 O3 142(100) . . . . ? 
C24 Cr1 C26 O3 81(34) . . . . ? 
C13 Cr1 C26 O3 173(100) . . . . ? 
C15 Cr1 C26 O3 80(34) . . . . ? 
Si2 Cr1 C26 O3 -169(100) . . . . ? 
C15 C24 C29 C42 -1.3(6) . . . . ? 
Cr1 C24 C29 C42 52.7(3) . . . . ? 
C15 C24 C29 Cr1 -54.0(3) . . . . ? 
C22 Cr1 C29 C24 126.0(4) . . . . ? 
C26 Cr1 C29 C24 -143.5(2) . . . . ? 
C23 Cr1 C29 C24 -54.5(3) . . . . ? 
C42 Cr1 C29 C24 135.5(3) . . . . ? 
C13 Cr1 C29 C24 109.2(2) . . . . ? 
C15 Cr1 C29 C24 26.4(2) . . . . ? 
Si2 Cr1 C29 C24 67.5(2) . . . . ? 
C22 Cr1 C29 C42 -9.5(5) . . . . ? 
C26 Cr1 C29 C42 80.9(2) . . . . ? 
C23 Cr1 C29 C42 169.9(2) . . . . ? 
C24 Cr1 C29 C42 -135.5(3) . . . . ? 
C13 Cr1 C29 C42 -26.3(2) . . . . ? 
C15 Cr1 C29 C42 -109.2(2) . . . . ? 
Si2 Cr1 C29 C42 -68.0(2) . . . . ? 
Si2 C13 C42 C29 1.0(6) . . . . ? 
Cr1 C13 C42 C29 -53.1(4) . . . . ? 
Si2 C13 C42 Cr1 54.1(3) . . . . ? 
C24 C29 C42 C13 1.6(6) . . . . ? 
Cr1 C29 C42 C13 54.7(4) . . . . ? 
C24 C29 C42 Cr1 -53.0(3) . . . . ? 
C22 Cr1 C42 C13 39.3(3) . . . . ? 
C26 Cr1 C42 C13 125.0(3) . . . . ? 
C23 Cr1 C42 C13 -154.1(3) . . . . ? 
C29 Cr1 C42 C13 -136.2(4) . . . . ? 
C24 Cr1 C42 C13 -109.2(3) . . . . ? 
C15 Cr1 C42 C13 -74.7(2) . . . . ? 
Si2 Cr1 C42 C13 -31.3(2) . . . . ? 
C22 Cr1 C42 C29 175.5(2) . . . . ? 
C26 Cr1 C42 C29 -98.8(2) . . . . ? 
C23 Cr1 C42 C29 -17.9(4) . . . . ? 
C24 Cr1 C42 C29 27.0(2) . . . . ? 
C13 Cr1 C42 C29 136.2(4) . . . . ? 
C15 Cr1 C42 C29 61.5(2) . . . . ? 
Si2 Cr1 C42 C29 105.0(2) . . . . ? 
C41 C40 C46 C41 0.1(9) 3_556 . . . ? 
C40 C41 C46 C40 -0.1(8) 3_556 . . . ? 
 
_diffrn_measured_fraction_theta_max    0.999 
_diffrn_reflns_theta_full              25.00 
_diffrn_measured_fraction_theta_full   0.999 
_refine_diff_density_max    0.393 
_refine_diff_density_min   -0.509 
_refine_diff_density_rms    0.126 
